# Supplementary material for: Relationships between Weight Perceptions and Suicidal Behaviors in Chinese Adolescents: Results from an Ongoing School-Based Survey in Zhejiang Province
Source: MDPI journal article supplement (doi:10.3390/bs13010008), 2022-12-22
Supplement: s1 [file s1]

Supplementary Table S1. Adjusted odds ratios (95% CIs) of suicidal ideation, plans, and attempts by the self-perceived weight status within subgroups.

|                                  | Suicidal ideation |                 |                  | Suicidal plans |                 |                  | Suicidal attempts |                  |                  |
|----------------------------------|-------------------|-----------------|------------------|----------------|-----------------|------------------|-------------------|------------------|------------------|
|                                  | About right       | Underweight     | Overweight       | About right    | Underweight     | Overweight       | About right       | Underweight      | Overweight       |
| Age groups (years)               |                   |                 |                  |                |                 |                  |                   |                  |                  |
| ≤13                              | 1.00              | 1.07(0.72-1.61) | 1.39(0.98-1.97)  | 1.00           | 1.15(0.64-2.07) | 1.86(1.10-3.16)* | 1.00              | 1.01(0.49-2.09)  | 1.18(0.61-2.29)  |
| 14-15                            | 1.00              | 1.03(0.82-1.29) | 1.35(1.11-1.64)* | 1.00           | 0.90(0.64-1.25) | 1.20(0.91-1.57)  | 1.00              | 0.80(0.51-1.26)  | 1.66(1.19-2.30)* |
| ≥16                              | 1.00              | 1.16(0.96-1.40) | 1.12(0.96-1.30)  | 1.00           | 1.07(0.81-1.41) | 0.85(0.67-1.09)  | 1.00              | 1.13(0.77-1.65)  | 1.09(0.78-1.52)  |
| Heterogeneity test: $\chi^2$ (P) | NA                | 0.65(0.72)      | 2.79(0.25)       | NA             | 0.81(0.67)      | 8.32(0.02)       | NA                | 1.32(0.52)       | 3.23(0.20)       |
| Gender                           |                   |                 |                  |                |                 |                  |                   |                  |                  |
| Boys                             | 1.00              | 0.99(0.82-1.20) | 0.94(0.77-1.16)  | 1.00           | 1.09(0.83-1.43) | 1.00(0.74-1.35)  | 1.00              | 0.64(0.44-0.95)* | 1.40(0.96-2.03)  |
| Girls                            | 1.00              | 1.16(0.95-1.42) | 1.38(1.20-1.59)* | 1.00           | 0.89(0.66-1.20) | 1.07(0.87-1.33)  | 1.00              | 1.11(0.73-1.68)  | 1.40(1.07-1.82)* |
| Heterogeneity test: $\chi^2$ (P) | NA                | 1.26(0.26)      | 9.17(0.002)      | NA             | 0.97(0.33)      | 0.13(0.72)       | NA                | 3.62(0.06)       | 0.00(1.00)       |
| Location of school               |                   |                 |                  |                |                 |                  |                   |                  |                  |
| Rural                            | 1.00              | 1.13(0.94-1.34) | 1.22(1.06-1.41)* | 1.00           | 1.01(0.78-1.30) | 1.05(0.85-1.30)  | 1.00              | 1.14(0.82-1.60)  | 1.31(0.99-1.72)  |
| Urban                            | 1.00              | 1.07(0.86-1.34) | 1.22(1.02-1.46)* | 1.00           | 1.03(0.74-1.42) | 1.08(0.82-1.42)  | 1.00              | 0.80(0.51-1.26)  | 1.33(0.93-1.90)  |

|                                     |      |                 |                  |      |                 |                 |      |                 |                  |
|-------------------------------------|------|-----------------|------------------|------|-----------------|-----------------|------|-----------------|------------------|
| Heterogeneity test: $\chi^2$ (P) NA |      | 0.14(0.71)      | 0.00(1.00)       | NA   | 0.01(0.93)      | 0.03(0.87)      | NA   | 1.52(0.22)      | 0.00(0.95)       |
| Current smoking                     |      |                 |                  |      |                 |                 |      |                 |                  |
| No                                  | 1.00 | 1.15(1.00-1.32) | 1.24(1.10-1.39)* | 1.00 | 1.08(0.87-1.33) | 1.10(0.92-1.31) | 1.00 | 1.03(0.77-1.38) | 1.30(1.03-1.64)* |
| Yes                                 | 1.00 | 0.62(0.38-1.01) | 0.95(0.60-1.52)  | 1.00 | 0.61(0.34-1.11) | 0.65(0.36-1.18) | 1.00 | 0.79(0.41-1.53) | 1.39(0.73-2.63)  |
| Heterogeneity test: $\chi^2$ (P) NA |      | 5.68(0.02)      | 1.19(0.28)       | NA   | 3.17(0.08)      | 2.77(0.10)      | NA   | 0.52(0.47)      | 0.04(0.85)       |
| Current alcohol drinking            |      |                 |                  |      |                 |                 |      |                 |                  |
| No                                  | 1.00 | 1.12(0.95-1.33) | 1.32(1.16-1.52)* | 1.00 | 0.95(0.74-1.22) | 1.15(0.94-1.43) | 1.00 | 1.03(0.72-1.49) | 1.42(1.06-1.89)* |
| Yes                                 | 1.00 | 1.04(0.81-1.33) | 0.99(0.80-1.22)  | 1.00 | 1.09(0.79-1.51) | 0.88(0.66-1.18) | 1.00 | 0.99(0.67-1.47) | 1.17(0.84-1.63)  |
| Heterogeneity test: $\chi^2$ (P) NA |      | 0.23(0.63)      | 5.06(0.02)       | NA   | 0.43(0.51)      | 2.14(0.14)      | NA   | 0.02(0.89)      | 0.74(0.39)       |
| Body mass index                     |      |                 |                  |      |                 |                 |      |                 |                  |
| Underweight                         | 1.00 | 1.04(0.84-1.28) | 1.27(0.88-1.83)  | 1.00 | 0.78(0.57-1.05) | 0.88(0.52-1.50) | 1.00 | 0.78(0.52-1.17) | 1.45(0.78-2.69)  |
| Normal weight                       | 1.00 | 1.11(0.91-1.34) | 1.21(1.07-1.37)* | 1.00 | 1.18(0.90-1.55) | 1.11(0.92-1.34) | 1.00 | 1.18(0.81-1.71) | 1.33(1.04-1.69)* |
| Overweight / obesity                | 1.00 | 1.34(0.57-3.12) | 1.14(0.63-2.09)  | 1.00 | 1.06(0.32-3.56) | 1.04(0.44-2.43) | 1.00 | 1.28(0.30-5.47) | 0.97(0.35-2.67)  |
| Heterogeneity test: $\chi^2$ (P) NA |      | 0.45(0.80)      | 0.10(0.95)       | NA   | 3.95(0.14)      | 0.66(0.72)      | NA   | 2.30(0.32)      | 0.44(0.80)       |

---

All models were adjusted for age, gender, location of school, school type, school performance, paternal education, maternal education, smoking, alcohol drinking, physical activity, physical measurement of body mass index, feelings of loneliness, sleep loss due to worry and experience of sadness / despair, weight control related behaviors of

---

exercising, dieting, taking laxatives, taking diet pills, and fasting.

\* Significant results.

Supplementary Table S2. Adjusted odds ratios (95% CIs) of suicidal ideation, plans, and attempts by the accuracy of weight perceptions within subgroups.

---

|                                  | Suicidal ideation |                 |                  | Suicidal plans |                 |                  | Suicidal attempts |                  |                  |
|----------------------------------|-------------------|-----------------|------------------|----------------|-----------------|------------------|-------------------|------------------|------------------|
|                                  | Accurate          | Underestimated  | Overestimated    | Accurate       | Underestimated  | Overestimated    | Accurate          | Underestimated   | Overestimated    |
| Age groups (years)               |                   |                 |                  |                |                 |                  |                   |                  |                  |
| ≤13                              | 1.00              | 1.14(0.72-1.79) | 1.34(0.96-1.86)  | 1.00           | 1.21(0.61-2.39) | 1.65(1.02-2.67)* | 1.00              | 0.90(0.35-2.27)  | 1.08(0.59-1.98)  |
| 14-15                            | 1.00              | 1.02(0.77-1.36) | 1.30(1.08-1.55)* | 1.00           | 1.11(0.75-1.65) | 1.37(1.06-1.76)* | 1.00              | 1.11(0.65-1.90)  | 1.87(1.36-2.56)* |
| ≥16                              | 1.00              | 1.08(0.84-1.38) | 1.04(0.90-1.20)  | 1.00           | 1.21(0.84-1.75) | 0.91(0.73-1.14)  | 1.00              | 1.16(0.72-1.89)  | 1.06(0.78-1.43)  |
| Heterogeneity test: $\chi^2$ (P) | NA                | 0.19(0.91)      | 4.46(0.11)       | NA             | 0.11(0.95)      | 8.21(0.02)       | NA                | 0.22(0.89)       | 7.05(0.03)       |
| Gender                           |                   |                 |                  |                |                 |                  |                   |                  |                  |
| Boys                             | 1.00              | 1.02(0.82-1.26) | 0.98(0.81-1.17)  | 1.00           | 1.22(0.89-1.66) | 1.10(0.85-1.43)  | 1.00              | 0.79(0.49-1.25)  | 1.33(0.93-1.90)  |
| Girls                            | 1.00              | 1.09(0.80-1.49) | 1.26(1.10-1.43)* | 1.00           | 1.13(0.72-1.76) | 1.16(0.95-1.41)  | 1.00              | 2.04(1.27-3.29)* | 1.42(1.10-1.82)* |
| Heterogeneity test: $\chi^2$ (P) | NA                | 0.12(0.73)      | 4.76(0.03)       | NA             | 0.08(0.78)      | 0.10(0.75)       | NA                | 7.76(0.01)       | 0.09(0.77)       |
| Location of school               |                   |                 |                  |                |                 |                  |                   |                  |                  |
| Rural                            | 1.00              | 1.01(0.80-1.26) | 1.12(0.98-1.28)  | 1.00           | 0.96(0.69-1.34) | 1.01(0.83-1.23)  | 1.00              | 1.17(0.77-1.76)  | 1.27(0.98-1.64)  |
| Urban                            | 1.00              | 1.17(0.89-1.52) | 1.19(1.00-1.40)  | 1.00           | 1.55(1.07-2.25) | 1.39(1.07-1.79)* | 1.00              | 1.11(0.64-1.93)  | 1.49(1.07-2.07)* |
| Heterogeneity test: $\chi^2$ (P) | NA                | 0.67(0.41)      | 0.31(0.58)       | NA             | 3.55(0.06)      | 2.00(0.16)       | NA                | 0.02(0.88)       | 0.56(0.45)       |

Current smoking

|                                  |      |                 |                  |      |                 |                 |      |                 |                  |
|----------------------------------|------|-----------------|------------------|------|-----------------|-----------------|------|-----------------|------------------|
| No                               | 1.00 | 1.10(0.91-1.31) | 1.14(1.03-1.27)* | 1.00 | 1.17(0.90-1.53) | 1.12(0.95-1.31) | 1.00 | 1.13(0.79-1.62) | 1.30(1.04-1.61)* |
| Yes                              | 1.00 | 0.70(0.39-1.26) | 1.14(0.75-1.75)  | 1.00 | 1.02(0.51-2.06) | 1.16(0.68-1.96) | 1.00 | 1.06(0.46-2.43) | 1.64(0.93-2.88)  |
| Heterogeneity test: $\chi^2$ (P) | NA   | 2.08(0.15)      | 0.00(1.00)       | NA   | 0.13(0.72)      | 0.02(0.90)      | NA   | 0.02(0.89)      | 0.56(0.45)       |

Current alcohol drinking

|                                  |      |                 |                  |      |                 |                 |      |                 |                  |
|----------------------------------|------|-----------------|------------------|------|-----------------|-----------------|------|-----------------|------------------|
| No                               | 1.00 | 1.08(0.88-1.33) | 1.23(1.08-1.39)* | 1.00 | 1.10(0.80-1.51) | 1.20(0.99-1.46) | 1.00 | 1.11(0.72-1.73) | 1.41(1.07-1.85)* |
| Yes                              | 1.00 | 0.98(0.72-1.33) | 0.94(0.77-1.14)  | 1.00 | 1.21(0.82-1.80) | 0.98(0.75-1.27) | 1.00 | 1.18(0.72-1.93) | 1.23(0.91-1.67)  |
| Heterogeneity test: $\chi^2$ (P) | NA   | 0.27(0.61)      | 5.10(0.02)       | NA   | 0.14(0.71)      | 1.47(0.23)      | NA   | 0.03(0.86)      | 0.43(0.51)       |

Body mass index

|                                  |      |                 |                  |      |                 |                 |      |                 |                  |
|----------------------------------|------|-----------------|------------------|------|-----------------|-----------------|------|-----------------|------------------|
| Underweight                      | 1.00 | NA              | 1.00(0.81-1.22)  | 1.00 | NA              | 1.27(0.94-1.70) | 1.00 | NA              | 1.37(0.93-2.03)  |
| Normal weight                    | 1.00 | 1.11(0.91-1.34) | 1.21(1.07-1.37)* | 1.00 | 1.18(0.90-1.55) | 1.11(0.92-1.34) | 1.00 | 1.18(0.81-1.71) | 1.33(1.04-1.69)* |
| Overweight / obesity             | 1.00 | 0.98(0.60-1.60) | NA               | 1.00 | 0.98(0.49-2.00) | NA              | 1.00 | 1.13(0.48-2.66) | NA               |
| Heterogeneity test: $\chi^2$ (P) | NA   | NA              | NA               | NA   | NA              | NA              | NA   | NA              | NA               |

---

All models were adjusted for age, gender, location of school, school type, school performance, paternal education, maternal education, smoking, alcohol drinking, physical activity, physical measurement of body mass index, feelings of loneliness, sleep loss due to worry and experience of sadness / despair, weight control related behaviors of exercising, dieting, taking laxatives, taking diet pills, and fasting.

---

\* Significant results.

Supplementary Table S3. Sensitivity analyses: Adjusted odds ratios (95% CIs) of suicidal ideation, plans, and attempts  
by the self-perceived weight status and accuracy of weight perceptions among adolescents without smoking and alcohol

---

drinking.

|                                                         | Model 1           | Model 2           | Model 3           | Model 4           |
|---------------------------------------------------------|-------------------|-------------------|-------------------|-------------------|
| Excluding adolescents with smoking and alcohol drinking |                   |                   |                   |                   |
| <b>Suicidal ideation</b>                                |                   |                   |                   |                   |
| Self-perceived weight status                            |                   |                   |                   |                   |
| About right                                             | 1.00              | 1.00              | 1.00              | 1.00              |
| Underweight                                             | 1.21 (1.05-1.39)  | 1.13 (0.96-1.32)  | 1.07 (0.91-1.26)  | 1.13 (0.96-1.34)  |
| Overweight                                              | 1.54 (1.37-1.73)* | 1.62 (1.42-1.84)* | 1.51 (1.32-1.72)* | 1.33 (1.16-1.52)* |
| Accuracy of weight perceptions                          |                   |                   |                   |                   |
| Accurate                                                | 1.00              | 1.00              | 1.00              | 1.00              |
| Underestimated                                          | 1.06 (0.87-1.29)  | 1.06 (0.87-1.30)  | 1.03 (0.83-1.26)  | 1.10 (0.89-1.36)  |
| Overestimated                                           | 1.40 (1.25-1.56)* | 1.43 (1.27-1.61)* | 1.38 (1.23-1.56)* | 1.23 (1.09-1.40)* |
| <b>Suicidal plans</b>                                   |                   |                   |                   |                   |
| Self-perceived weight status                            |                   |                   |                   |                   |
| About right                                             | 1.00              | 1.00              | 1.00              | 1.00              |
| Underweight                                             | 1.13(0.91-1.42)   | 1.01(0.79-1.29)   | 0.95 (0.73-1.22)  | 0.97 (0.75-1.25)  |

|                                |                   |                   |                   |                  |
|--------------------------------|-------------------|-------------------|-------------------|------------------|
| Overweight                     | 1.32(1.09-1.60)*  | 1.42(1.16-1.74)*  | 1.28 (1.04-1.58)* | 1.14 (0.92-1.41) |
| Accuracy of weight perceptions |                   |                   |                   |                  |
| Accurate                       | 1.00              | 1.00              | 1.00              | 1.00             |
| Underestimated                 | 1.08 (0.79-1.47)  | 1.12 (0.81-1.53)  | 1.07 (0.78-1.48)  | 1.09 (0.79-1.52) |
| Overestimated                  | 1.34 (1.12-1.61)* | 1.36 (1.13-1.64)* | 1.30 (1.07-1.57)* | 1.17 (0.96-1.43) |

### Suicidal attempts

#### Self-perceived weight status

|             |                   |                   |                   |                   |
|-------------|-------------------|-------------------|-------------------|-------------------|
| About right | 1.00              | 1.00              | 1.00              | 1.00              |
| Underweight | 1.04 (0.73-1.46)  | 1.03 (0.71-1.50)  | 1.01 (0.69-1.47)  | 0.96 (0.66-1.41)  |
| Overweight  | 1.62 (1.24-2.12)* | 1.62 (1.22-2.15)* | 1.48 (1.11-1.97)* | 1.38 (1.03-1.86)* |

#### Accuracy of weight perceptions

|                |                   |                   |                   |                   |
|----------------|-------------------|-------------------|-------------------|-------------------|
| Accurate       | 1.00              | 1.00              | 1.00              | 1.00              |
| Underestimated | 1.19 (0.77-1.86)  | 1.13 (0.72-1.76)  | 1.12 (0.71-1.75)  | 1.05 (0.66-1.65)  |
| Overestimated  | 1.46 (1.13-1.89)* | 1.57 (1.20-2.05)* | 1.48 (1.13-1.94)* | 1.42 (1.07-1.88)* |

---

Model 1 adjusted for age, gender, location of school, school type, school performance, paternal education and maternal education; model 2 adjusted for model 1 plus health behaviors of physical activity, and physical measurement of body mass index; model 3 adjusted for model 2 plus mental health-related characteristics of feelings of loneliness, sleep loss



---

due to worry and experience of sadness / despair; model 4 adjusted for model 3 plus weight control related behaviors of exercising, dieting, taking laxatives, taking diet pills, and fasting.

\* Significant results.
